# Supplementary material
Source: PubMed Central journal article supplement (PMC6310133)
Supplement: NIHMS969162-supplement-Data_S1.pdf [file NIHMS969162-supplement-Data_S1.pdf]

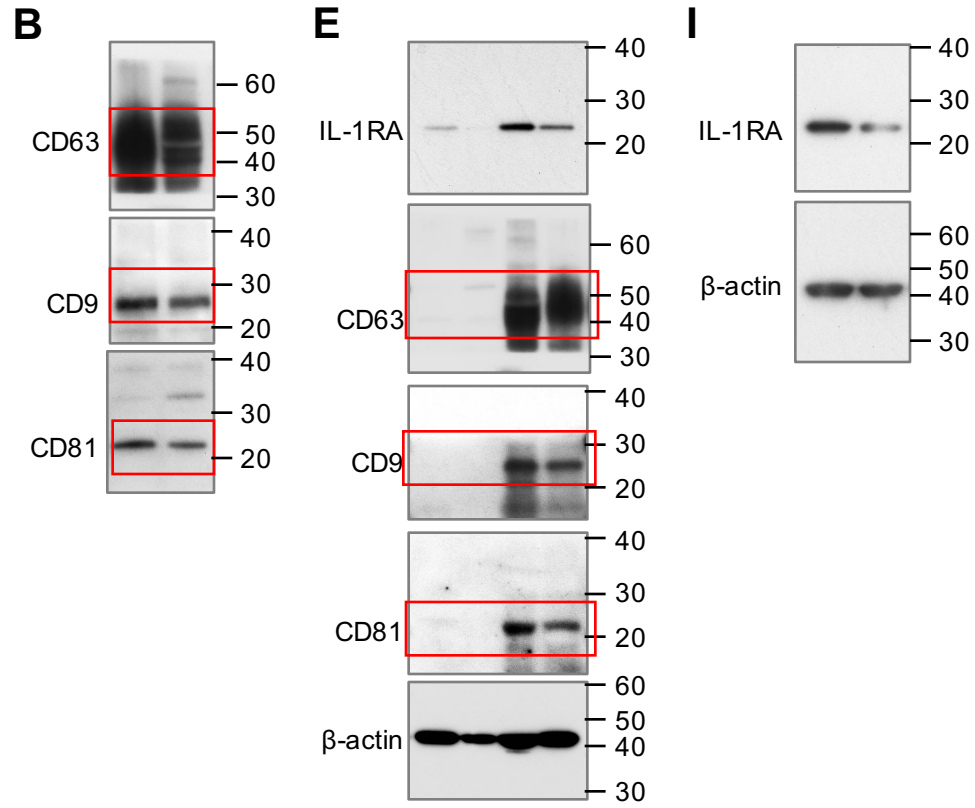

Western blotting film for Fig. 1

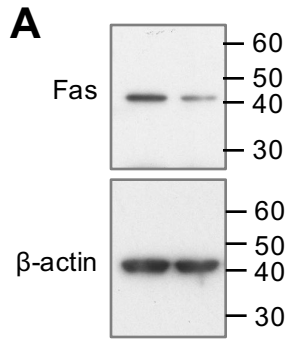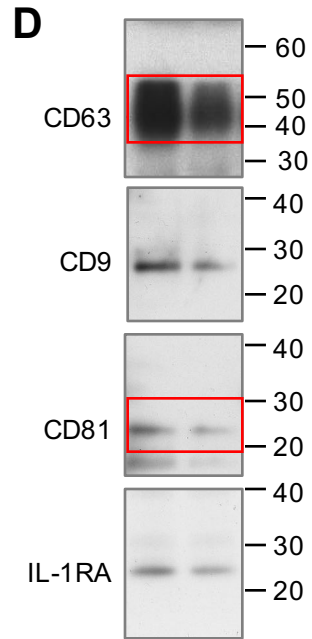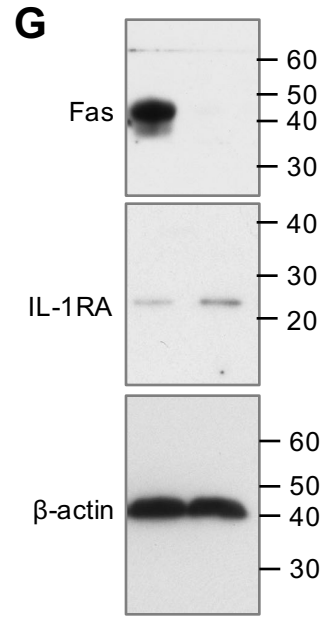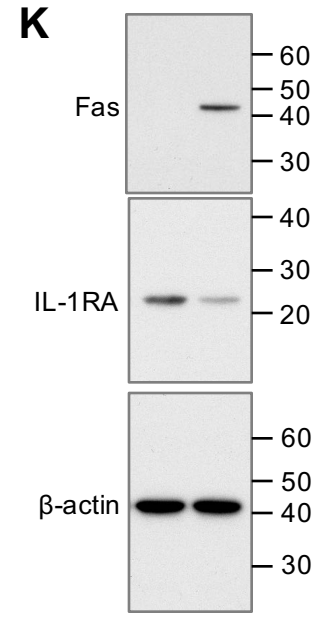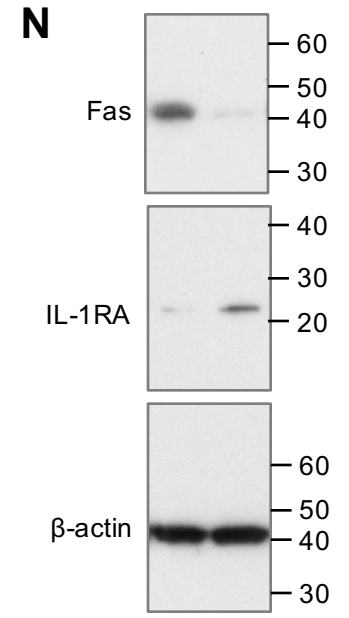

**Western blotting film for Fig. 2**

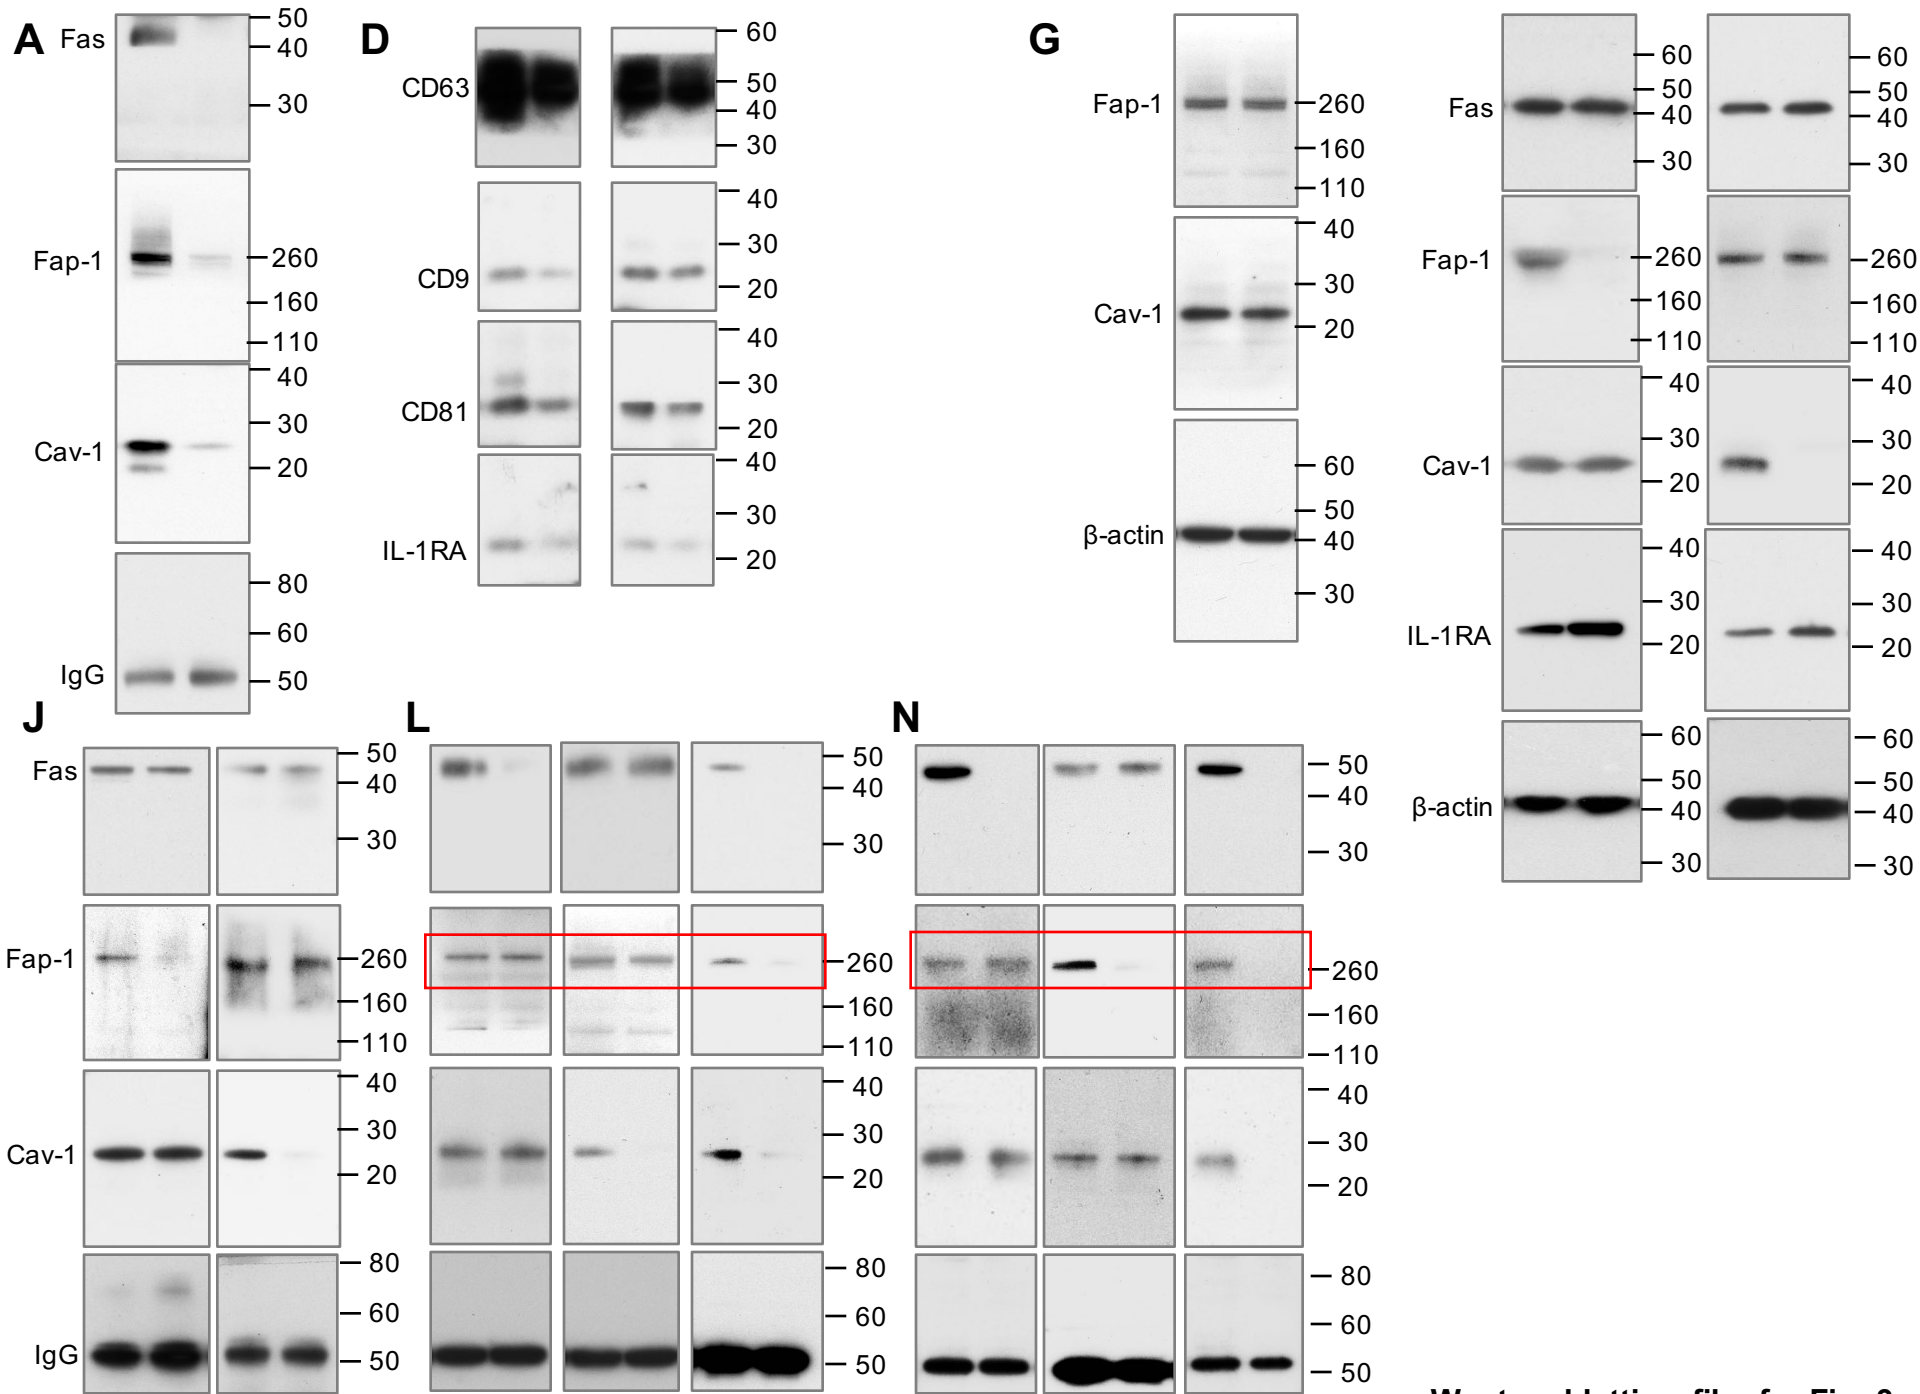

Western blotting film for Fig. 3

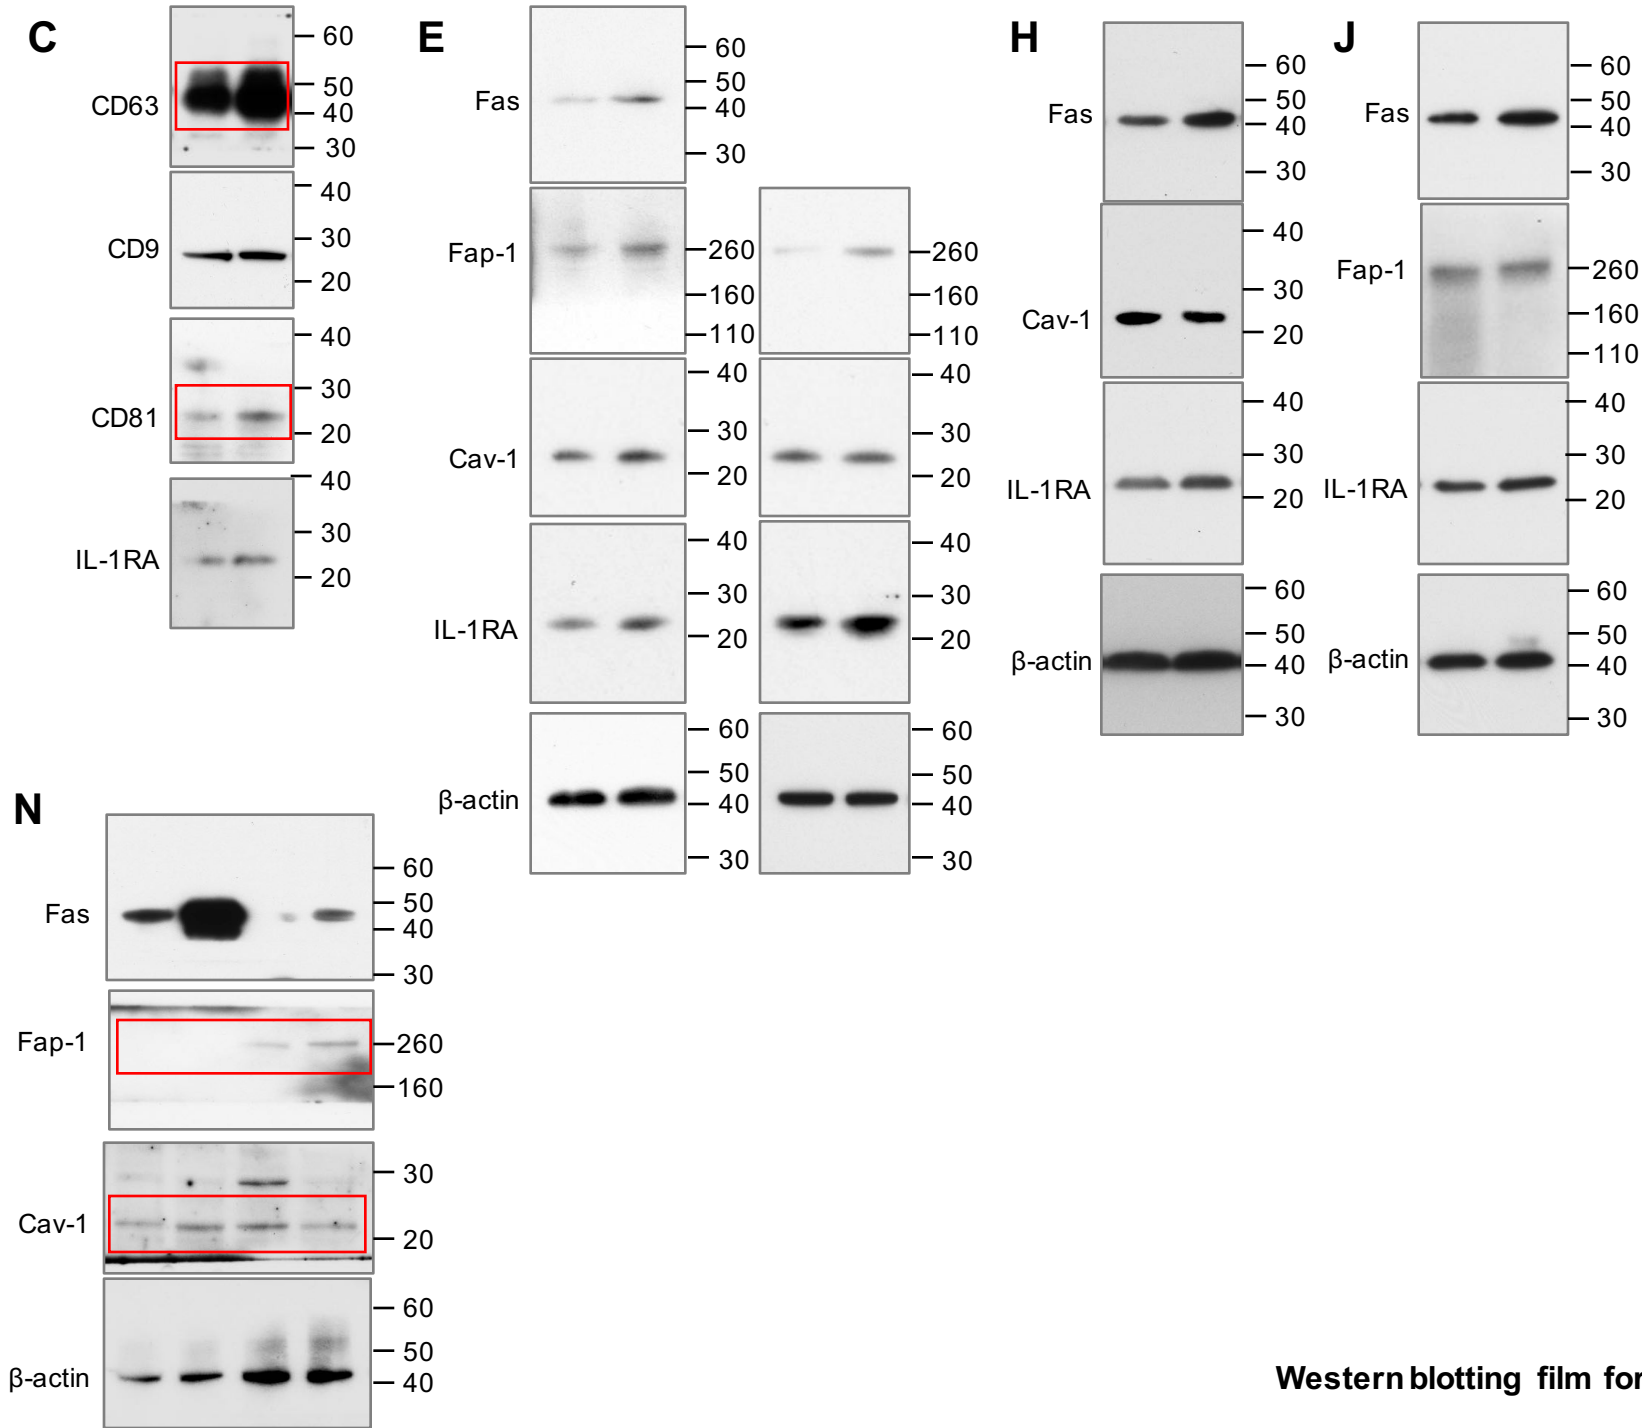

Western blotting film for Fig. 4
